# Supplementary material for: The Southern Ocean RADiolarian (SO-RAD) dataset: a new compilation of modern radiolarian census data
Source: Copernicus journal article supplement (doi:10.5194/essd-2021-148), 2021-06-30
Supplement: Supplementary file 1 [file essd-2021-148-supplement.pdf]

Supplement 1: List of radiolarian taxa included in the SO-RAD dataset.

| <b>Taxon name</b>                                     | <b>Reference</b>                                                |
|-------------------------------------------------------|-----------------------------------------------------------------|
| <i>Acanthodesmia micropora</i> (Popofsky)             | Petrushevskaya, 1971                                            |
| <i>Acanthodesmia viniculata</i> (Müeller)             | Petrushevskaya, 1971                                            |
| <i>Acanthosphaera</i> Ehrenberg spp.                  | Boltovskoy, 1998; Boltovskoy and Riedel, 1980                   |
| <i>Acrobotrys teralans</i> Renz                       | Renz, 1976                                                      |
| <i>Acrosphaera arktios</i> (Nigrini)                  | Nigrini, 1970                                                   |
| <i>Acrosphaera cyrtodon</i> (Haeckel)                 | Strelkov and Reshetnyak, 1971                                   |
| <i>Acrosphaera inflata</i> Haeckel                    | Haeckel, 1887                                                   |
| <i>Acrosphaera lappacea</i> (Haeckel)                 | Johnson and Nigrini, 1980                                       |
| <i>Acrosphaera mercurius</i> Lazarus                  | Lazarus, 1992                                                   |
| <i>Acrosphaera murrayana</i> (Haeckel)                | Hilmers, 1906                                                   |
| <i>Acrosphaera spinosa</i> Caulet                     | Caulet, 1986                                                    |
| <i>Actinomma antarcticum</i> (Haeckel)                | Nigrini and Moore, 1979                                         |
| <i>Actinomma arcadophorum</i> Haeckel                 | Haeckel, 1887                                                   |
| <i>Actinomma boreale</i> Cleve                        | Cortese and Bjørklund, 1998                                     |
| <i>Actinomma delicatulum</i> (Dogiel and Reschetnjak) | Petrushevskaya, 1967                                            |
| <i>Actinomma</i> Haeckel                              | Haeckel, 1860                                                   |
| <i>Actinomma hastatum</i> (Haeckel)                   | Rogers and De Deckker, 2007                                     |
| <i>Actinomma leptodermum</i> (Jørgensen) gr.          | Boltovskoy, 1998; Cortese and Bjørklund, 1998                   |
| <i>Actinomma medianum</i> Nigrini                     | Nigrini and Moore, 1979                                         |
| <i>Actinomma popofski</i> (Petrushevskaya)            | Petrushevskaya, 1967                                            |
| <i>Actinomma sol</i> Cleve                            | Boltovskoy, 1998                                                |
| <i>Actinomma trinacria</i> (Haeckel)                  | Cortese and Bjørklund, 1998                                     |
| <i>Actinosphaera</i> Hollande and Enjumet             | Hollande and Enjumet, 1960                                      |
| <i>Amphiplecta acrostoma</i> Haeckel                  | Haeckel, 1887                                                   |
| <i>Amphirhopalum ypsilon</i> Haeckel                  | Haeckel, 1887                                                   |
| <i>Androspyrus fenestrata</i> (Haeckel)               | Goll, 1980                                                      |
| <i>Anomalacantha dentata</i> Mast                     | Mast, 1910                                                      |
| <i>Antarctissa denticulata</i> (Ehrenberg)            | Petrushevskaya, 1967                                            |
| <i>Antarctissa</i> Petrushevskaya spp.                | Nigrini and Moore, 1979; Petrushevskaya, 1967                   |
| <i>Antarctissa strelkovi</i> Petrushevskaya           | Petrushevskaya, 1967                                            |
| <i>Anthocyrtidium ophirensis</i> (Ehrenberg)          | Petrushevskaya, 1968                                            |
| <i>Anthocyrtidium zanguebaricum</i> (Ehrenberg)       | Haeckel, 1887                                                   |
| <i>Arachnocorys umbellifera</i> Haeckel               | Haeckel, 1860                                                   |
| <i>Archipilium orthopterum</i> Haeckel                | Haeckel, 1887                                                   |
| <i>Artobotrys borealis</i> (Cleve)                    | Petrushevskaya, 1971                                            |
| <i>Artostrobos annulatus</i> (Bailey)                 | Boltovskoy, 1998; Petrushevskaya, 1967, 1971                    |
| <i>Artostrobos joergenseni</i> Petrushevskaya gr.     | Petrushevskaya, 1967                                            |
| <i>Axoprunum stauraxonium</i> Haeckel                 | Nigrini and Moore, 1979                                         |
| <i>Botryocampe inflata</i> (Bailey)                   | Matsuzaki et al., 2015; Itaki, 2009; Haeckel, 1887              |
| <i>Botryocephalina armata</i> Petrushevskaya          | Petrushevskaya, 1965                                            |
| <i>Botryocyrtis scutum</i> (Harting)                  | Boltovskoy, 1998; Nigrini and Moore, 1979                       |
| <i>Botryopyle cribrosa</i> (Ehrenberg)                | Haeckel, 1887                                                   |
| <i>Botryostrobos aquilonaris</i> (Bailey)             | Boltovskoy, 1998; Nigrini and Moore, 1979; Petrushevskaya, 1967 |
| <i>Botryostrobos auritus/australis</i> (Ehrenberg)    | Boltovskoy, 1998; Nigrini and Moore, 1979; Petrushevskaya, 1967 |
| <i>Botryostrobos</i> Haeckel                          | Haeckel, 1887                                                   |

|                                                               |                                                                            |
|---------------------------------------------------------------|----------------------------------------------------------------------------|
| <i>Buccinosphaera invaginata</i> Haeckel                      | Haeckel, 1887                                                              |
| <i>Callimitra</i> Haeckel                                     | Haeckel 1881                                                               |
| <i>Carpocanarium papillosum</i> (Ehrenberg)                   | (Ehrenberg), 1872                                                          |
| <i>Carpocanistrum</i> Haeckel spp.                            | Boltovskoy, 1998; Nigrini and Moore, 1979                                  |
| <i>Cenosphaera cristata</i> Haeckel                           | Haeckel, 1887                                                              |
| <i>Cenosphaera</i> Ehrenberg spp.                             | Boltovskoy, 1998; Nigrini and Moore, 1979                                  |
| <i>Cenosphaera</i> sp. aff. <i>C. perforata</i> Haeckel       | Benson, 1983                                                               |
| <i>Ceratocyrtis galeus</i> (Cleve)                            | Bjoerklund, 1976                                                           |
| <i>Ceratocyrtis histicosa</i> (Joergensen)                    | Petrushevskaya, 1971                                                       |
| <i>Chromyechinus antarctica</i> (Dreyer)                      | Itaki, 2009; Petrushevskaya, 1967                                          |
| <i>Circodiscus microporus</i> (Stoehr)                        | Petrushevskaya and Kozlova, 1972                                           |
| <i>Cladococcus abietinus</i> Haeckel                          | Haeckel, 1887                                                              |
| <i>Cladoscenum ancoratum</i> Haeckel                          | Haeckel, 1887                                                              |
| <i>Cladoscenum limbatum</i> Joergensen                        | Joergensen, 1905                                                           |
| <i>Cladoscenum</i> sp. 1                                      | No reference                                                               |
| <i>Cladoscenum tricolum</i> (Haeckel)                         | Joergensen, 1900                                                           |
| <i>Clathrocanium coarctatum</i> Ehrenberg                     | Ehrenberg, 1872                                                            |
| <i>Collosphaera confossa</i> Takahashi                        | Takahashi, 1991                                                            |
| <i>Collosphaera huxleyi</i> Mueller                           | Mueller, 1855                                                              |
| <i>Collosphaera macropora</i> Popofsky                        | Popofsky, 1917                                                             |
| <i>Collosphaera tuberosa</i> Haeckel                          | Haeckel, 1887                                                              |
| Collosphaeridae                                               | Several species of the subfamily Collosphaeridae Mueller; Boltovskoy, 1998 |
| <i>Cornutella profunda</i> Ehrenberg                          | Boltovskoy, 1998                                                           |
| <i>Corocalyptra craspedota</i> (Jørgensen)/cervus (Ehrenberg) | Björklund, 1976; Boltovskoy, 1998; Petrushevskaya, 1971                    |
| <i>Corythospyris stapedius</i> (Haeckel)                      | Goll, 1978                                                                 |
| <i>Cubotholus</i> Haeckel                                     | Haeckel 1887                                                               |
| <i>Cycladophora bicornis</i> (Popofsky)                       | Nigrini and Moore, 1979                                                    |
| <i>Cycladophora davisiana cornutoides</i> (Petrushevskaya)    | Petrushevskaya, 1967                                                       |
| <i>Cycladophora davisiana davisiana</i> (Ehrenberg)           | Boltovskoy, 1998; Nigrini and Moore, 1979; Petrushevskaya, 1967            |
| <i>Cypassis</i> Haeckel                                       | Haeckel 1887                                                               |
| <i>Cypassis irregularis</i> Nigrini                           | Nigrini, 1968                                                              |
| <i>Cyrtolagena laguncula</i> (Haeckel)                        | Boltovskoy, 1998; Petrushevskaya, 1971                                     |
| <i>Dendrospyris</i> Haeckel                                   | Haeckel 1881                                                               |
| <i>Dictyocoryne profunda</i> Ehrenberg                        | Boltovskoy, 1998; Nigrini and Moore, 1979                                  |
| <i>Dictyocoryne truncatum</i> (Ehrenberg)                     | Boltovskoy, 1998; Nigrini and Moore, 1979                                  |
| <i>Dictyophimus archipilium</i> Petrushevskaya                | Petrushevskaya , 1975                                                      |
| <i>Dictyophimus crisisae</i> Ehrenberg/hirundo (Haeckel)      | Boltovskoy, 1998; Nigrini and Moore, 1979                                  |
| <i>Dictyophimus</i> Ehrenberg                                 | Ehrenberg 1847                                                             |
| <i>Dictyophimus infabricatus</i> Nigrini                      | Nigrini, 1968                                                              |
| <i>Dictyophimus killmari</i> (Renz)                           | (Renz), 1974                                                               |
| <i>Dictyophimus macropterus</i> (Ehrenberg)                   | Takahashi, 1991                                                            |
| <i>Didymocyrtis tetralthalamus</i> (Haeckel)                  | Boltovskoy, 1998; Nigrini and Moore, 1979                                  |
| <i>Drupptractus irregularis</i> Popofsky                      | Popofsky, 1912                                                             |
| <i>Drupptractus variabilis</i> Dumitrica                      | Dumitrica, 1973; Takahashi, 1991                                           |
| <i>Enneaphormis rotula</i> Haeckel                            | Haeckel, 1887                                                              |
| <i>Euchitonia elegans</i> (Ehrenberg)/furcata Ehrenberg gr.   | Boltovskoy, 1998                                                           |

|                                                          |                                                    |
|----------------------------------------------------------|----------------------------------------------------|
| <i>Eucyrtidium acuminatum</i> (Ehrenberg)                | Ehrenberg, 1847                                    |
| <i>Eucyrtidium annulatum</i> (Popofsky)                  | (Popofsky), 1913                                   |
| <i>Eucyrtidium anomalum</i> (Haeckel)                    | (Haeckel) Haeckel, 1862                            |
| <i>Eucyrtidium calvertense</i> (Martin)                  | Martin, 1904                                       |
| <i>Eucyrtidium cienkowskii</i> Haeckel                   | Haeckel, 1887                                      |
| <i>Eucyrtidium</i> Ehrenberg emend. Nigrini spp.         | Boltovskoy, 1998; Nigrini and Moore, 1979          |
| <i>Eucyrtidium hexagonatum</i> Haeckel                   | Haeckel, 1887                                      |
| <i>Eucyrtidium hexastichum</i> Haeckel                   | Haeckel, 1887                                      |
| <i>Eucyrtidium octocolum</i> (Haeckel)                   | Petrushevskaya, 1971                               |
| <i>Eucyrtidium teuscheri</i> Haeckel                     | Haeckel, 1887                                      |
| <i>Euphysetta elegans</i> Borgert                        | Borgert, 1902                                      |
| <i>Euphysetta nathorstii</i> Cleve                       | Cleve, 1899                                        |
| <i>Euphysetta staurocodon</i> Haeckel                    | Takahashi, 1991                                    |
| <i>Gondwanaria campanulaeformis</i> (Campbell and Clark) | (Campbell and Clark), 1945                         |
| <i>Gondwanaria dogieli</i> Petrushevskaya                | Petrushevskaya, 1979                               |
| <i>Gondwanaria</i> Petrushevskaya and Kozlova            | Petrushevskaya and Kozlova 1975                    |
| <i>Gonosphaera primordialis</i> Jørgensen 1905           | Jørgensen 1905                                     |
| <i>Heliodiscus asteriscus</i> Haeckel                    | Boltovskoy, 1998; Nigrini and Moore, 1979          |
| <i>Hexacantium arachnoidale</i> Hollande                 | Hollande, 1960                                     |
| <i>Hexacantium enthacanthum</i> Joergensen               | Joergensen, 1900                                   |
| <i>Hexacantium giganteum</i> Cortese and Bjorklund       | Cortese and Bjorklund, 1998                        |
| <i>Hexacantium laevigatum</i> Haeckel                    | Haeckel, 1887                                      |
| <i>Hexacantium melpomene</i> (Haeckel)                   | Van de Paverd, 1995                                |
| <i>Hexacantium pachydermum</i> Joergensen                | Joergensen, 1900                                   |
| <i>Hexalonche amphisiphon</i> Haeckel                    | Haeckel, 1887                                      |
| <i>Hexapyle dodecantha</i> Haeckel gr.                   | Boltovskoy, 1998; Nigrini and Moore, 1979          |
| <i>Hexastylus</i> spp. Haeckel gr.                       | Rogers and De Deckker, 2007                        |
| <i>Hymeniastrum euclidis</i> Haeckel                     | Nigrini and Moore, 1979                            |
| <i>Lamprocyclas maritalis</i> Haeckel s.l.               | Boltovskoy, 1998; Nigrini and Moore, 1979          |
| <i>Lamprocyrtis hannai</i> Campbell and Clark            | Boltovskoy, 1998                                   |
| <i>Lamprocyrtis nigrinae</i> (Caulet)                    | Kling, 1973                                        |
| <i>Lampromitra coronata</i> Haeckel                      | Haeckel, 1887                                      |
| <i>Lampromitra quadricuspis</i> Haeckel                  | Haeckel, 1887                                      |
| <i>Lampromitra schultzei</i> (Haeckel)                   | Takahashi, 1991                                    |
| <i>Larcopyle buetschlii</i> Dreyer                       | Boltovskoy, 1998; Nigrini and Moore, 1979          |
| <i>Larcopyle polyacantha</i> (Campbell and Clark)        | Lazarus et al., 2005                               |
| <i>Larcopyle pylomaticus</i> (Riedel)                    | Lazarus et al., 2005                               |
| <i>Larcopyle weddellium</i> Lazarus et al.               | Lazarus et al., 2005                               |
| <i>Larospira bulbosa</i> Goll and Bjoerklund             | Goll and Bjoerklund, 1989                          |
| <i>Larospira quadrangula</i> Haeckel                     | Haeckel, 1887                                      |
| <i>Larnacilla typus</i> Haeckel                          | Haeckel, 1887; Dumitrica, 1989 (as Larnacopylomma) |
| <i>Lipmanella bombus</i> Haeckel                         | Haeckel, 1887                                      |
| <i>Lipmanella dictyoceras</i> (Haeckel)                  | Kling, 1973                                        |
| <i>Lirella melo</i> (Cleve)                              | Takahashi, 1991                                    |
| <i>Liriospyris reticulata</i> (Ehrenberg)                | Goll, 1968                                         |
| <i>Litharachnium tentorium</i> Haeckel                   | Haeckel, 1860                                      |
| Litheliidae/Pyloniidae Haeckel                           | Haeckel, 1887                                      |
| <i>Lithelius minor</i> Jørgensen gr.                     | Boltovskoy, 1998; Nigrini and Moore, 1979          |

|                                                                 |                                                                                         |
|-----------------------------------------------------------------|-----------------------------------------------------------------------------------------|
| <i>Lithelius nautiloides</i> Popofsky                           | Boltovskoy, 1998; Nigrini and Moore, 1979; Petrushevskaya, 1967                         |
| <i>Lithelius</i> sp. 1                                          | No reference                                                                            |
| <i>Lithelius spiralis</i> Haeckel                               | Haeckel, 1860                                                                           |
| <i>Lithocampe ? furcaspiculata</i> (Harting)                    | Boltovskoy, 1998; Nigrini and Moore, 1979 (as <i>P. corbula</i> ); Petrushevskaya, 1967 |
| <i>Lithocampe ? platycephala</i> (Ehrenberg)                    | Cortese et al., 2003; Petrushevskaya, 1967                                              |
| <i>Lithomelissa</i> (?) sp. A Petrushevskaya                    | Petrushevskaya, 1967                                                                    |
| <i>Lithomelissa</i> Ehrenberg                                   | Ehrenberg, 1847                                                                         |
| <i>Lithomelissa hystrix</i> Joergensen                          | Joergensen, 1900                                                                        |
| <i>Lithomelissa laticeps</i> Joergensen                         | Joergensen, 1905                                                                        |
| <i>Lithomelissa setosa</i> Jørgensen                            | Cortese et al., 2003; Takahashi, 1991                                                   |
| <i>Lithomelissa</i> sp. B                                       | No reference                                                                            |
| <i>Lithomelissa thoracites</i> Haeckel                          | Petrushevskaya, 1971                                                                    |
| <i>Lithostrobos cuspidatus</i> Haeckel                          | Haeckel 1887                                                                            |
| <i>Lonchosphaera spicata</i> Popofsky                           | Popofsky, 1908                                                                          |
| <i>Lophophaena buetschlii</i> (Haeckel)                         | Petrushevskaya, 1971                                                                    |
| <i>Lophophaena</i> Ehrenberg                                    | Ehrenberg 1847                                                                          |
| <i>Lophophaena hispida</i> (Ehrenberg)                          | Petrushevskaya, 1971                                                                    |
| <i>Lophospyris pentagona</i> (Ehrenberg)                        | (Ehrenberg), 1872; Petrushevskaya, 1971                                                 |
| <i>Mitrocalpis araneafera</i> Popofsky                          | Popofsky, 1908                                                                          |
| <i>Peridium longispinum</i> Jørgensen                           | Bjørklund, 1976; Bjørklund et al., 1998                                                 |
| <i>Peripyramis circumtexta</i> Haeckel                          | Haeckel, 1887                                                                           |
| <i>Peromelissa phalacra</i> Haeckel                             | Boltovskoy, 1998; Petrushevskaya, 1971                                                  |
| <i>Phormacantha hystrix</i> (Joergensen)                        | Joergensen, 1905                                                                        |
| <i>Phormospyris stabilis</i> Goll                               | Goll, 1976                                                                              |
| <i>Phormostichoartus corbula</i> (Harting)                      | Nigrini, 1977                                                                           |
| <i>Phorticium clevei</i> Haeckel                                | Boltovskoy, 1998; Petrushevskaya, 1967                                                  |
| <i>Plectacantha cremastoplegma</i> Nigrini                      | Nigrini, 1968                                                                           |
| <i>Plectacantha oikiskos</i> Jørgensen                          | Jørgensen, 1905                                                                         |
| <i>Plectopyramis dodecomma</i> Haeckel                          | Haeckel, 1887                                                                           |
| <i>Porodiscus</i> Haeckel                                       | Haeckel, 1881                                                                           |
| <i>Protocystis balfouri</i> (Murray)                            | Borgert, 1911                                                                           |
| <i>Protocystis harstoni</i> (Murray)                            | Murray, 1885; Schroeder, 1913                                                           |
| <i>Protocystis swirei</i> (Murray)                              | Haecker, 1908                                                                           |
| <i>Pseudocubus obeliscus</i> Haeckel                            | Haeckel, 1887                                                                           |
| <i>Pseudodictyophimus bicornis</i> (Ehrenberg)                  | Welling, 1997                                                                           |
| <i>Pseudodictyophimus gracilipes</i> (Bailey) s.l.              | Boltovskoy, 1998 (as <i>Dictyophimus gracilipes</i> )                                   |
| <i>Pseudodictyophimus gracilipes multispinus</i> Bernstein      | Bernstein, 1934                                                                         |
| <i>Pseudodictyophimus horrida</i> (Petrushevskaya)              | Petrushevskaya, 1975                                                                    |
| <i>Pseudodictyophimus platycephalus</i> (Haeckel)               | Petrushevskaya, 1971                                                                    |
| <i>Pterocanium auritum</i> Nigrini & Caulet                     | Nigrini and Caulet, 1992                                                                |
| <i>Pterocanium charybdeum</i> (Mueller)                         | (Mueller), 1858                                                                         |
| <i>Pterocanium korotnevi</i> (Dogel)                            | Dogel and Reshetnyak , 1952                                                             |
| <i>Pterocanium praetextum eucolpum</i> Haeckel                  | Haeckel, 1887                                                                           |
| <i>Pterocanium praetextum praetextum</i> (Ehrenberg)            | Boltovskoy, 1998; Nigrini and Moore, 1979; Petrushevskaya, 1971                         |
| <i>Pterocorys clausus</i> (Popofsky)/ <i>zancleus</i> (Mueller) | Boltovskoy, 1998; Nigrini and Moore, 1979                                               |
| <i>Pterocorys hertwigii</i> (Haeckel)                           | Petrushevskaya, 1971                                                                    |
| <i>Pterocorys minythorax</i> (Nigrini)                          | Nigrini and Moore, 1979                                                                 |

|                                                                               |                                                                     |
|-------------------------------------------------------------------------------|---------------------------------------------------------------------|
| <i>Pteroscenium pinnatum</i> Haeckel                                          | Haeckel, 1887                                                       |
| <i>Pylospira octopyle</i> Haeckel                                             | Haeckel, 1887                                                       |
| <i>Rhizoplegma boreale</i> Popofsky                                           | Popofsky, 1908                                                      |
| <i>Saccospyris antarctica</i> Haecker                                         | Boltovskoy, 1998; Petrushevskaya, 1967                              |
| <i>Saccospyris conithorax</i> Petrushevskaya                                  | Petrushevskaya, 1965                                                |
| <i>Saccospyris</i> spp. Haecker                                               | Haecker, 1907                                                       |
| <i>Saturnalis circularis</i> Haeckel                                          | Haeckel, 1887                                                       |
| <i>Schizodiscus stylumoides</i> Dogiel                                        | Petrushevskaya, 1967                                                |
| <i>Sethoconus tabulatus</i> Haeckel                                           | Haeckel, 1887                                                       |
| <i>Siphocampe arachnea</i> (Ehrenberg) gr.                                    | Nigrini, 1977                                                       |
| <i>Siphocampe lineata</i> (Ehrenberg) gr.                                     | Takahashi, 1991                                                     |
| <i>Siphonosphaera socialis</i> Haeckel                                        | Haeckel, 1887                                                       |
| <i>Solenosphaera zanguebarica</i> Brandt                                      | Brandt, 1905                                                        |
| <i>Sphaeropyle robusta</i> Kling                                              | Kling, 1973                                                         |
| <i>Sphaerozoum punctatum</i> Müller                                           | Rogers and De Deckker, 2007                                         |
| <i>Spongaster tetras</i> Ehrenberg                                            | Boltovskoy, 1998; Nigrini and Moore, 1979                           |
| <i>Spongodiscus resurgens</i> Ehrenberg                                       | Boltovskoy, 1998                                                    |
| <i>Spongopyle osculosa</i> Dreyer                                             | Nigrini and Moore, 1979                                             |
| <i>Spongotrochus glacialis</i> Popofsky                                       | Boltovskoy, 1998; Nigrini and Moore, 1979; Petrushevskaya, 1967     |
| <i>Spongotrochus</i> Haeckel/ <i>Spongopyle</i> Dreyer                        | Haeckel, 1860; Dreyer, 1889                                         |
| <i>Spongurus cylindricus</i> Haeckel                                          | Haeckel, 1860                                                       |
| <i>Spongurus</i> sp. cf. <i>S. elliptica</i> (Ehrenberg)                      | (Ehrenberg), 1872                                                   |
| <i>Stichocorys seriata</i> Joergensen                                         | Joergensen, 1905                                                    |
| <i>Stichopilidium kruegeri</i> (Popofsky)                                     | Nishimura & Yamauchi, 1984                                          |
| <i>Stichopilium bicorne</i> Haeckel                                           | Haeckel, 1887                                                       |
| <i>Stylatractus</i> Haeckel                                                   | Haeckel, 1887                                                       |
| <i>Stylatractus neptunus</i> Haeckel                                          | Nigrini and Moore, 1979; Petrushevskaya, 1967                       |
| <i>Stylatractus ostracion</i> (Haeckel)                                       | Haeckel, 1887                                                       |
| <i>Stylatractus</i> sp. A                                                     | No reference                                                        |
| <i>Stylochlamyidium asteriscus</i> Haeckel                                    | Boltovskoy, 1998; Nigrini and Moore, 1979                           |
| <i>Stylochlamyidium</i> Haeckel                                               | Haeckel 1881                                                        |
| <i>Stylochlamyidium venustum</i> (Bailey)                                     | Boltovskoy, 1998; Nigrini and Moore, 1979                           |
| <i>Stylodictya aculeata</i> Jørgensen                                         | Boltovskoy, 1998; Nigrini and Moore, 1979; Petrushevskaya, 1967     |
| <i>Stylodictya</i> Ehrenberg                                                  | Ehrenberg, 1847                                                     |
| <i>Stylodictya tenuispina</i> Jørgensen                                       | Nigrini and Moore, 1979                                             |
| <i>Stylodictya validispina</i> Haeckel                                        | Boltovskoy, 1998; Nigrini and Moore, 1979; Petrushevskaya, 1967     |
| <i>Stylosphaera</i> Ehrenberg                                                 | Ehrenberg, 1847                                                     |
| <i>Styptosphaera ? spumacea</i> Haeckel                                       | Nigrini and Moore, 1979                                             |
| <i>Tessarastrum straussii</i> Haeckel                                         | Haeckel, 1887; Takahashi, 1991 (as <i>Amphirhopalum straussii</i> ) |
| <i>Tetraphormis dodecaster</i> (Haeckel)                                      | Takahashi, 1991                                                     |
| <i>Tetrapyle octacantha</i> Mueller/ <i>Octopyle stenozone</i><br>Haeckel gr. | Boltovskoy, 1998; Nigrini and Moore, 1979                           |
| <i>Theocorys veneris</i> Haeckel                                              | Haeckel, 1887                                                       |
| <i>Theocorythium trachelium</i> (Ehrenberg) s.l.                              | Boltovskoy, 1998; Nigrini and Moore, 1979; Petrushevskaya, 1971     |
| <i>Tholospyris gephyristes</i> Huelsemann                                     | Bjørklund et al., 1998                                              |
| <i>Tricerasyris antarctica</i> (Haecker)                                      | Haecker, 1908                                                       |
| Trissocyclidae Haeckel, emend. Goll                                           | Haeckel, 1881; Goll, 1968                                           |
| <i>Trisulcus testudus</i> Petrushevskaya                                      | Petrushevskaya, 1971                                                |
| <i>Trisulcus triacanthus</i> Popofsky                                         | Popofsky, 1913                                                      |

*Zygocircus productus* (Hertwig)

Nassellaria Ehrenberg, indet.

Spumellaria Ehrenberg, indet.

Haeckel, 1887

Ehrenberg, 1875

Ehrenberg, 1875

Supplement 2: Recommended taxonomic groupings to simplify/harmonise the dataset. Adapted from Cortese & Prebble, 2015.

| <b>Taxa</b>                                      | <b>Group</b>                           |                                    |
|--------------------------------------------------|----------------------------------------|------------------------------------|
| <i>Actinomma delicatulum</i>                     | ACTINOMMA DELICATULUM/POPOFSKII        |                                    |
| <i>Actinomma popofskii</i>                       |                                        |                                    |
| <i>Anthocyrtidium ophirense</i>                  | ANTHOCYRTIDIUM OPHIRENSE/ZANGUEBARICUM |                                    |
| <i>Anthocyrtidium zanguebaricum</i>              |                                        |                                    |
| <i>Acrosphaera arktios</i>                       | COLLOSPHAERIDAE                        |                                    |
| <i>Acrosphaera cyrtodon</i>                      |                                        |                                    |
| <i>Acrosphaera inflata</i>                       |                                        |                                    |
| <i>Acrosphaera lappacea</i>                      |                                        |                                    |
| <i>Acrosphaera murrayana</i>                     |                                        |                                    |
| <i>Acrosphaera spinosa</i>                       |                                        |                                    |
| <i>Buccinosphaera invaginata</i>                 |                                        |                                    |
| <i>Collosphaerid</i>                             |                                        |                                    |
| <i>Collosphaera confossa</i>                     |                                        |                                    |
| <i>Collosphaera huxleyi</i>                      |                                        |                                    |
| <i>Collosphaera macropora</i>                    |                                        |                                    |
| <i>Collosphaera tuberosa</i>                     |                                        |                                    |
| <i>Solenosphaera zanguebarica</i>                |                                        |                                    |
| <i>Siphonosphaera socialis</i>                   |                                        |                                    |
| <i>Drupptractus variabilis</i>                   |                                        | DRUPPATRACTUS VARIABILIS/OSTRACION |
| <i>Stylatractus ostracion</i>                    |                                        |                                    |
| <i>Eucyrtidium spp.</i>                          | EUCYRTIDIUM SPP                        |                                    |
| <i>Eucyrtidium acuminatum</i>                    |                                        |                                    |
| <i>Eucyrtidium annulatum</i>                     |                                        |                                    |
| <i>Eucyrtidium anomalum</i>                      |                                        |                                    |
| <i>Eucyrtidium calvertense</i>                   |                                        |                                    |
| <i>Eucyrtidium cienkowskii</i>                   |                                        |                                    |
| <i>Eucyrtidium hexagonatum</i>                   |                                        |                                    |
| <i>Eucyrtidium hexastichus</i>                   |                                        |                                    |
| <i>Eucyrtidium octocolum</i>                     |                                        |                                    |
| <i>Eucyrtidium teuscheri</i>                     |                                        |                                    |
| <i>Hexacantium enthacanthum</i>                  | HEXACANTIUM PACHY/ENTHA                |                                    |
| <i>Hexacantium pachydermum</i>                   |                                        |                                    |
| <i>Lampromitra coronata</i>                      | LAMPROMITRA PENTALACTIS/QUADRICUSPIS   |                                    |
| <i>Lampromitra quadricuspis</i>                  |                                        |                                    |
| <i>Lithelius minor</i>                           | LITHELIUS MINOR/SPIRALIS               |                                    |
| <i>Lithelius spiralis</i>                        |                                        |                                    |
| <i>Lithomelissa setosa</i>                       | LITHOMELISSA SETOSA Group              |                                    |
| <i>Lithomelissa hystrix</i>                      |                                        |                                    |
| <i>Trisulcus testudus</i>                        | PHORMACANTHA/PLECTACANTHA              |                                    |
| <i>Phormacantha hystrix</i>                      |                                        |                                    |
| <i>Plectacantha cremastoplegma</i>               | PHORMACANTHA/PLECTACANTHA              |                                    |
| <i>Plectacantha oikiskos</i>                     |                                        |                                    |
| <i>Pseudodictyophimus gracilipes</i>             | PSEUDODICTYOPHIMUS GRACILIPES S.L.     |                                    |
| <i>Pseudodictyophimus gracilipes multispinus</i> |                                        |                                    |
| <i>Pseudodictyophimus platycephalus</i>          |                                        |                                    |
| <i>Pseudodictyophimus bicornis</i>               |                                        |                                    |
| <i>Pterocanium praetextum praetextum</i>         | PTEROCANIUM PRAETEXTUM/EUCOLPUM        |                                    |
| <i>Pterocanium praetextum eucolpum</i>           |                                        |                                    |
| <i>Saccospyris antarctica</i>                    | SACCOSPYRIS ANTARCTICA                 |                                    |
| <i>Saccospyris conythorax</i>                    |                                        |                                    |
| <i>Spongopyle osculosa</i>                       | SPONGOPYLE OSCULOSA/RESURGENS          |                                    |
| <i>Spongodiscus resurgens</i>                    |                                        |                                    |
